# Supplementary material for: The Relative Influences of Phosphometabolites and pH on Action Potential Morphology during Myocardial Reperfusion: A Simulation Study
Source: PubMed Central journal article supplement (PMC3492384; doi:10.1371/journal.pone.0047117), 2012-11-07
Supplement: pone.0047117.s001.pdf [file pone.0047117.s001.pdf]

## **Text S1**

Supplementary Material for “The Relative Influences of Phosphometabolites and pH on Action Potential Morphology During Myocardial Reperfusion: A Simulation Study.”

Byron N. Roberts and David J. Christini

Table S1: Action Potential Duration (90) During Initial 10 Minutes of Reperfusion (ms)

|            | Pre   | R0   | R1    | R2    | R3    | R4    | R5    | R6    | R7    | R8    | R9    | R10   | Mean  |
|------------|-------|------|-------|-------|-------|-------|-------|-------|-------|-------|-------|-------|-------|
| Control    | 109.0 | 16.5 | 88.5  | 92.0  | 88.5  | 84.5  | 82.0  | 81.0  | 80.0  | 79.5  | 79.5  | 79.5  | 83.5  |
| Dual Clamp | 109.0 | 16.5 | 66.5  | 67.5  | 64.5  | 61.5  | 59.5  | 57.5  | 56.0  | 54.5  | 53.5  | 52.5  | 59.4  |
| pH Clamp   | 109.0 | 16.5 | 87.5  | 90.0  | 86.5  | 83.0  | 80.5  | 79.0  | 77.0  | 75.5  | 74.5  | 73.5  | 80.7  |
| pH 6.4     | 109.0 | 16.5 | 88.0  | 91.5  | 88.0  | 83.5  | 80.0  | 78.0  | 76.0  | 74.5  | 73.5  | 72.5  | 80.6  |
| pH 6.9     | 109.0 | 16.5 | 88.5  | 92.0  | 88.0  | 84.0  | 81.0  | 79.5  | 78.0  | 77.0  | 76.5  | 76.5  | 82.1  |
| pH 7.9     | 109.0 | 16.5 | 88.5  | 92.0  | 88.5  | 85.0  | 82.5  | 82.0  | 81.5  | 81.5  | 81.5  | 81.5  | 84.4  |
| ATP Clamp  | 109.0 | 16.5 | 66.5  | 66.5  | 61.5  | 57.0  | 53.5  | 51.5  | 49.5  | 48.5  | 47.5  | 47.0  | 54.9  |
| ATP 25     | 109.0 | 16.5 | 48.0  | 48.5  | 45.0  | 41.5  | 38.5  | 37.0  | 35.5  | 34.5  | 33.5  | 33.0  | 39.5  |
| ATP 50     | 109.0 | 16.5 | 72.5  | 73.0  | 68.0  | 63.0  | 59.0  | 56.0  | 54.5  | 53.0  | 52.0  | 51.5  | 60.2  |
| ATP 75     | 109.0 | 16.5 | 83.0  | 85.0  | 80.0  | 75.5  | 72.0  | 70.0  | 68.0  | 67.0  | 66.5  | 66.5  | 73.4  |
| ATP 150    | 109.0 | 16.5 | 95.5  | 102.0 | 101.0 | 99.5  | 99.0  | 99.0  | 99.0  | 99.0  | 99.0  | 99.0  | 99.2  |
| ATP 200    | 109.0 | 16.5 | 101.0 | 109.5 | 111.0 | 111.0 | 110.5 | 111.0 | 111.0 | 111.0 | 110.5 | 110.5 | 109.7 |

Table S2: Action Potential Amplitude During Initial 10 Minutes of Reperfusion (mV)

|            | Pre   | R0   | R1    | R2    | R3    | R4    | R5    | R6    | R7    | R8    | R9    | R10   | Mean  |
|------------|-------|------|-------|-------|-------|-------|-------|-------|-------|-------|-------|-------|-------|
| Control    | 118.4 | 36.1 | 101.9 | 110.1 | 110.9 | 109.7 | 109.5 | 109.1 | 108.9 | 108.9 | 108.9 | 108.9 | 108.7 |
| Dual Clamp | 118.4 | 36.1 | 90.2  | 105.1 | 105.2 | 102.2 | 99.1  | 97.1  | 94.8  | 92.6  | 90.5  | 88.6  | 96.5  |
| pH Clamp   | 118.4 | 36.1 | 101.8 | 111.2 | 111.6 | 109.2 | 106.8 | 105.7 | 104.7 | 103.9 | 103.2 | 102.6 | 106.0 |
| pH 6.4     | 118.4 | 36.1 | 101.9 | 110.3 | 110.6 | 108.5 | 107.8 | 106.7 | 106.3 | 105.8 | 105.4 | 105.2 | 106.9 |
| pH 6.9     | 118.4 | 36.1 | 101.9 | 110.0 | 110.7 | 109.1 | 108.7 | 108.1 | 107.7 | 107.5 | 107.4 | 107.3 | 107.8 |
| pH 7.9     | 118.4 | 36.1 | 101.9 | 110.2 | 111.1 | 110.5 | 110.1 | 109.9 | 109.8 | 109.8 | 109.8 | 109.9 | 109.3 |
| ATP Clamp  | 118.4 | 36.1 | 89.9  | 103.5 | 103.7 | 101.8 | 99.8  | 98.9  | 97.7  | 96.5  | 95.4  | 94.6  | 98.2  |
| ATP 25     | 118.4 | 36.1 | 78.9  | 103.7 | 104.5 | 102.2 | 100.6 | 99.5  | 98.1  | 96.7  | 95.4  | 95.0  | 97.5  |
| ATP 50     | 118.4 | 36.1 | 94.7  | 105.0 | 105.6 | 103.6 | 101.7 | 101.0 | 100.0 | 99.1  | 98.3  | 97.5  | 100.6 |
| ATP 75     | 118.4 | 36.1 | 99.5  | 107.2 | 108.0 | 106.4 | 105.7 | 105.0 | 104.6 | 104.3 | 104.2 | 104.1 | 104.9 |
| ATP 150    | 118.4 | 36.1 | 104.5 | 113.8 | 117.0 | 116.6 | 116.2 | 116.1 | 116.3 | 116.3 | 116.1 | 115.9 | 114.9 |
| ATP 200    | 118.4 | 36.1 | 106.2 | 119.1 | 122.0 | 122.1 | 121.8 | 121.8 | 121.9 | 121.8 | 121.5 | 121.2 | 119.9 |

Table S3: Resting Membrane Potential During Initial 10 Minutes of Reperfusion (mV)

|            | Pre   | R0    | R1    | R2    | R3    | R4    | R5    | R6    | R7    | R8    | R9    | R10   | Mean  |
|------------|-------|-------|-------|-------|-------|-------|-------|-------|-------|-------|-------|-------|-------|
| Control    | -78.0 | -48.4 | -69.2 | -75.9 | -77.3 | -77.4 | -77.4 | -77.2 | -77.1 | -77.0 | -76.9 | -76.8 | -76.2 |
| Dual Clamp | -78.0 | -48.4 | -68.5 | -75.2 | -76.4 | -76.1 | -75.5 | -75.0 | -74.4 | -73.9 | -73.4 | -73.0 | -74.1 |
| pH Clamp   | -78.0 | -48.4 | -69.3 | -76.2 | -77.5 | -77.5 | -77.1 | -76.8 | -76.4 | -76.1 | -75.8 | -75.5 | -75.8 |
| pH 6.4     | -78.0 | -48.4 | -69.3 | -75.9 | -77.2 | -77.2 | -77.0 | -76.8 | -76.6 | -76.4 | -76.2 | -76.1 | -75.9 |
| pH 6.9     | -78.0 | -48.4 | -69.2 | -75.9 | -77.2 | -77.3 | -77.2 | -77.0 | -76.8 | -76.7 | -76.6 | -76.4 | -76.0 |
| pH 7.9     | -78.0 | -48.4 | -69.2 | -75.9 | -77.4 | -77.6 | -77.5 | -77.4 | -77.3 | -77.2 | -77.2 | -77.1 | -76.4 |
| ATP Clamp  | -78.0 | -48.4 | -68.3 | -75.0 | -76.3 | -76.2 | -75.9 | -75.6 | -75.2 | -75.0 | -74.7 | -74.5 | -74.7 |
| ATP 25     | -78.0 | -48.4 | -68.2 | -74.9 | -76.2 | -76.1 | -75.7 | -75.4 | -75.1 | -74.8 | -74.5 | -74.3 | -74.5 |
| ATP 50     | -78.0 | -48.4 | -68.5 | -75.2 | -76.5 | -76.5 | -76.2 | -75.9 | -75.7 | -75.4 | -75.2 | -75.0 | -75.0 |
| ATP 75     | -78.0 | -48.4 | -68.9 | -75.5 | -76.9 | -76.9 | -76.8 | -76.6 | -76.4 | -76.2 | -76.1 | -75.9 | -75.6 |
| ATP 150    | -78.0 | -48.4 | -69.7 | -76.7 | -78.2 | -78.5 | -78.5 | -78.4 | -78.4 | -78.3 | -78.3 | -78.2 | -77.3 |
| ATP 200    | -78.0 | -48.4 | -70.1 | -77.3 | -79.0 | -79.3 | -79.3 | -79.2 | -79.2 | -79.1 | -79.1 | -79.0 | -78.1 |

Table S4: Mean Currents (uA/uF) During Reperfusion (pH Simulations)

|                | Control | Dual Clamp | pH Clamp | pH 6.4  | pH 6.9  | pH 7.9  |
|----------------|---------|------------|----------|---------|---------|---------|
| $I_{Na}$       | -0.2022 | -0.1739    | -0.1948  | -0.1958 | -0.1992 | -0.2044 |
| $I_{Na,b}$     | -0.2269 | -0.2223    | -0.2225  | -0.2237 | -0.2255 | -0.2278 |
| $I_{Na-L}$     | -0.0119 | -0.0074    | -0.0109  | -0.0111 | -0.0116 | -0.0121 |
| NCX            | -0.3058 | -0.0445    | -0.1745  | -0.2246 | -0.2704 | -0.3292 |
| NaK            | 0.4911  | 0.0783     | 0.3000   | 0.3838  | 0.4433  | 0.5215  |
| $I_{Ca(L),Na}$ | -0.1218 | -0.0500    | -0.1056  | -0.1095 | -0.1163 | -0.1256 |
| $I_{Ca(L),K}$  | 0.0613  | 0.0182     | 0.0535   | 0.0546  | 0.0580  | 0.0639  |
| $I_{Ca(L)}$    | -1.0362 | -0.4851    | -0.9138  | -0.9514 | -0.9991 | -1.0609 |
| $I_{Cl}$       | -0.3560 | -0.5343    | -0.4431  | -0.4300 | -0.3890 | -0.3330 |
| $I_{Kr}$       | 0.1445  | 0.0793     | 0.1356   | 0.1369  | 0.1411  | 0.1470  |
| $I_{Ks}$       | 0.1119  | 0.0205     | 0.1027   | 0.1004  | 0.1063  | 0.1164  |
| $I_{Kp}$       | 0.0604  | 0.0313     | 0.0600   | 0.0576  | 0.0589  | 0.0617  |
| $I_{K1}$       | 0.8181  | 0.6872     | 0.6794   | 0.7634  | 0.7983  | 0.8287  |
| $I_{Ca(T)}$    | -0.0740 | -0.0767    | -0.0720  | -0.0726 | -0.0733 | -0.0744 |
| $I_{Ca,b}$     | -0.4852 | -0.5001    | -0.4717  | -0.4791 | -0.4826 | -0.4869 |
| $I_{pCa}$      | 0.9589  | 0.9700     | 1.0960   | 1.0328  | 0.9904  | 0.9385  |
| $I_{K(ATP)}$   | 0.3115  | 0.3243     | 0.2961   | 0.2976  | 0.3051  | 0.3161  |

Table S5: Mean Currents (uA/uF) During Reperfusion (Phosphometabolite Simulations)

|                | Control | Dual Clamp | ATP Clamp | ATP 25  | ATP 50  | ATP 75  | ATP 150 | ATP 200 |
|----------------|---------|------------|-----------|---------|---------|---------|---------|---------|
| $I_{Na}$       | -0.2022 | 0.1739     | -0.1793   | -0.1811 | -0.1844 | -0.1922 | -0.2217 | -0.2357 |
| $I_{Na,b}$     | -0.2269 | -0.2223    | -0.2261   | -0.2373 | -0.2266 | -0.2249 | -0.2334 | -0.2391 |
| $I_{Na-L}$     | -0.0119 | -0.0074    | -0.0070   | -0.0050 | -0.0081 | -0.0101 | -0.0156 | -0.0187 |
| NCX            | -0.3058 | -0.0445    | -0.0632   | -0.0089 | -0.1145 | -0.2140 | -0.4355 | -0.4883 |
| NaK            | 0.4911  | 0.0783     | 0.1352    | 0.0920  | 0.2140  | 0.3527  | 0.6941  | 0.7856  |
| $I_{Ca(L),Na}$ | 0.1218  | -0.0500    | -0.0495   | -0.0187 | -0.0646 | -0.0962 | -0.1620 | -0.1814 |
| $I_{Ca(L),K}$  | 0.0613  | 0.0182     | 0.0176    | 0.0052  | 0.0257  | 0.0444  | 0.0912  | 0.1050  |
| $I_{Ca(L)}$    | -1.0362 | -0.4851    | -0.4805   | -0.1892 | -0.6096 | -0.8626 | -1.2527 | -1.3384 |
| $I_{Cl}$       | -0.3560 | -0.5343    | -0.4781   | -0.5419 | -0.4568 | -0.4012 | -0.2812 | -0.2355 |
| $I_{Kr}$       | 0.1445  | 0.0793     | 0.0713    | 0.0370  | 0.0874  | 0.1200  | 0.1808  | 0.2046  |
| $I_{Ks}$       | 0.0723  | 0.0132     | 0.0162    | 0.0017  | 0.0274  | 0.0658  | 0.2303  | 0.3315  |
| $I_{Kp}$       | 0.0604  | 0.0313     | 0.0278    | 0.0130  | 0.0331  | 0.0477  | 0.0818  | 0.0934  |
| $I_{K1}$       | 0.8181  | 0.6872     | 0.7108    | 0.7823  | 0.7414  | 0.7738  | 0.8412  | 0.8136  |
| $I_{Ca(T)}$    | -0.0740 | -0.0767    | -0.0767   | -0.0703 | -0.0751 | -0.0742 | -0.0733 | -0.0717 |
| $I_{Ca,b}$     | -0.4852 | -0.5001    | -0.5079   | -0.5366 | -0.5034 | -0.4905 | -0.4796 | -0.4760 |
| $I_{pCa}$      | 0.9589  | 0.9700     | 0.9332    | 0.7655  | 0.9378  | 0.9747  | 0.9083  | 0.8749  |
| $I_{K(ATP)}$   | 0.3115  | 0.3243     | 0.3034    | 0.2372  | 0.3164  | 0.3248  | 0.2648  | 0.2106  |

Table S6:  $\text{pH}_i$  and Ion Concentrations (mM) During Reperfusion (pH Simulations)

|                                | Control  | Dual Clamp | pH Clamp | pH 6.4   | pH 6.9   | pH 7.9   |
|--------------------------------|----------|------------|----------|----------|----------|----------|
| Peak $[\text{Na}^+_i]$         | 19.50    | 32.17      | 25.61    | 23.49    | 20.91    | 18.69    |
| Mean $[\text{Na}^+_i]$         | 17.48    | 23.89      | 19.59    | 19.17    | 18.17    | 17.06    |
| Peak $[\text{Ca}^{2+}_i]$      | 0.001702 | 0.001218   | 0.001715 | 0.001974 | 0.001842 | 0.001603 |
| Mean $[\text{Ca}^{2+}_i]$      | 0.000738 | 0.000758   | 0.001044 | 0.000886 | 0.000796 | 0.000704 |
| Mean $[\text{Ca}_{\text{SR}}]$ | 3.081    | 0.701      | 2.827    | 3.022    | 3.059    | 3.083    |
| Mean CaiT Ampl                 | 0.001000 | 0.000282   | 0.000635 | 0.000938 | 0.000998 | 0.000981 |
| Mean $[\text{K}^+_i]$          | 108.75   | 99.33      | 105.76   | 106.79   | 107.78   | 109.49   |
| End $\text{pH}_i$              | 7.09     | 6.09       | 6.13     | 6.69     | 6.93     | 7.17     |
| Mean $\text{pH}_i$             | 6.93     | 6.23       | 6.25     | 6.64     | 6.81     | 7.01     |
| Mean $[\text{ADP}]$            | 0.0197   | 0.1448     | 0.0042   | 0.0097   | 0.0146   | 0.0237   |

Table S7:  $\text{pH}_i$  and Ion Concentrations (mM) During Reperfusion (Phosphometabolite Simulations)

|                                | Control  | Dual Clamp | ATP Clamp | ATP 25   | ATP 50   | ATP 75   | ATP 150  | ATP 200  |
|--------------------------------|----------|------------|-----------|----------|----------|----------|----------|----------|
| Peak $[\text{Na}^+_i]$         | 19.50    | 32.17      | 27.79     | 25.93    | 25.61    | 22.91    | 14.11    | 12.63    |
| Mean $[\text{Na}^+_i]$         | 17.48    | 23.89      | 23.07     | 21.60    | 21.70    | 19.91    | 13.41    | 11.07    |
| Peak $[\text{Ca}^{2+}_i]$      | 0.001702 | 0.001218   | 0.001164  | 0.001085 | 0.001800 | 0.001911 | 0.001424 | 0.001592 |
| Mean $[\text{Ca}^{2+}_i]$      | 0.000738 | 0.000758   | 0.000685  | 0.000459 | 0.000700 | 0.000769 | 0.000654 | 0.000614 |
| Mean $[\text{Ca}_{\text{SR}}]$ | 3.081    | 0.701      | 0.786     | 1.805    | 2.556    | 2.925    | 3.501    | 4.103    |
| Mean CaiT Ampl                 | 0.001000 | 0.000282   | 0.000335  | 0.000372 | 0.000841 | 0.001027 | 0.000935 | 0.001155 |
| Mean $[\text{K}^+_i]$          | 108.75   | 99.33      | 100.81    | 100.64   | 102.53   | 105.48   | 114.13   | 117.17   |
| End $\text{pH}_i$              | 7.09     | 6.09       | 7.07      | 7.07     | 7.08     | 7.08     | 7.10     | 7.10     |
| Mean $\text{pH}_i$             | 6.93     | 6.23       | 6.92      | 6.92     | 6.93     | 6.93     | 6.94     | 6.94     |
| Mean $[\text{ADP}]$            | 0.0197   | 0.1448     | 0.7173    | 0.0314   | 0.0274   | 0.0235   | 0.0119   | 0.0039   |

## Phosphometabolite Equations

During pre-ischemia, all metabolites are held at their initial values. During ischemia:

$$[\text{ATP}] = 0.0006549t^3 - 0.02305t^2 - 0.104837t + 7.216 \quad (\text{S.1})$$

$$[\text{PCr}] = -0.01259 + 12.339e^{-0.92559t} + 0.96819e^{-0.078496t} \quad (\text{S.2})$$

During reperfusion:

$$[\text{ATP}]_t = [\text{ATP}]_{t-\Delta t} - \frac{[\text{ATP}]_{t-\Delta t} - 0.4[\text{ATP}_{\text{preischemic}}]}{5 \times 10^3 \text{ms}} \Delta t \quad (\text{S.3})$$

$$[\text{PCr}]_t = [\text{PCr}]_{t-\Delta t} - \frac{[\text{PCr}]_{t-\Delta t} - 0.75[\text{ion}_{\text{preischemic}}]}{5 \times 10^3 \text{ms}} \Delta t \quad (\text{S.4})$$

During ischemia and reperfusion:

$$[\text{Cr}] = 22.2 - [\text{PCr}] \quad (\text{S.5})$$

$$[\text{ADP}] = \frac{[\text{ATP}] * [\text{Cr}]}{[\text{PCr}] * [\text{H}_i^+] * 1.66 \times 10^6} \quad (\text{S.6})$$

$$[\text{AMP}] = \frac{[\text{ADP}] * [\text{ADP}] * 1.05}{[\text{ATP}]} \quad (\text{S.7})$$

$$[\text{Pi}_{\text{free}}] = [\text{Pi}_{\text{total}} - (3 * [\text{ATP}] + 2 * [\text{ATP}] + [\text{AMP}] + [\text{PCr}]) \quad (\text{S.8})$$

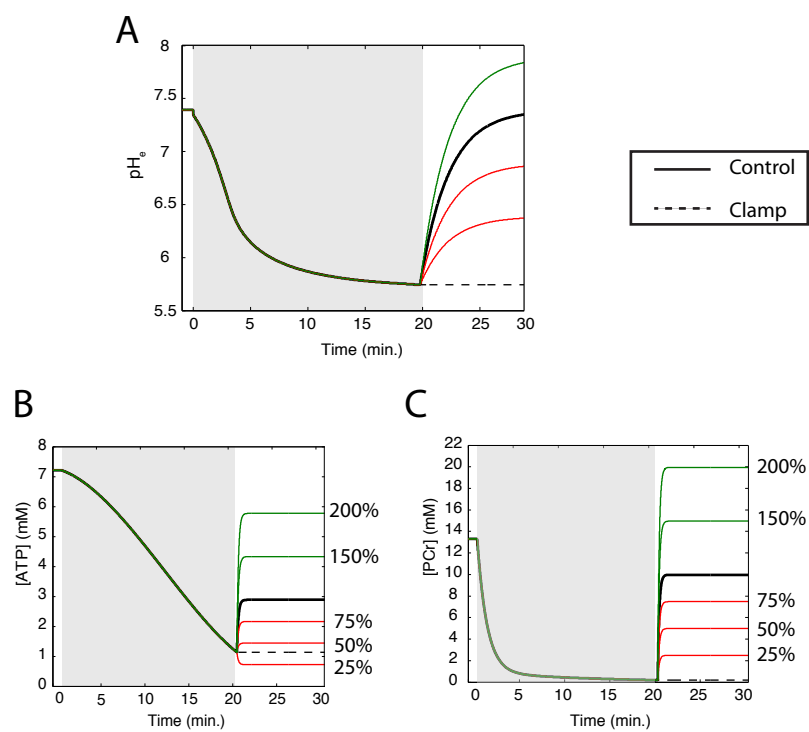

Figure S1: **Summary of simulations.** In each simulation, the end-reperfusion targets of extracellular pH ( $\text{pH}_e$ ) (A) and/or ATP (B) and PCr (C) were controlled. Gray regions denote ischemic phase of simulations. See text for additional information.

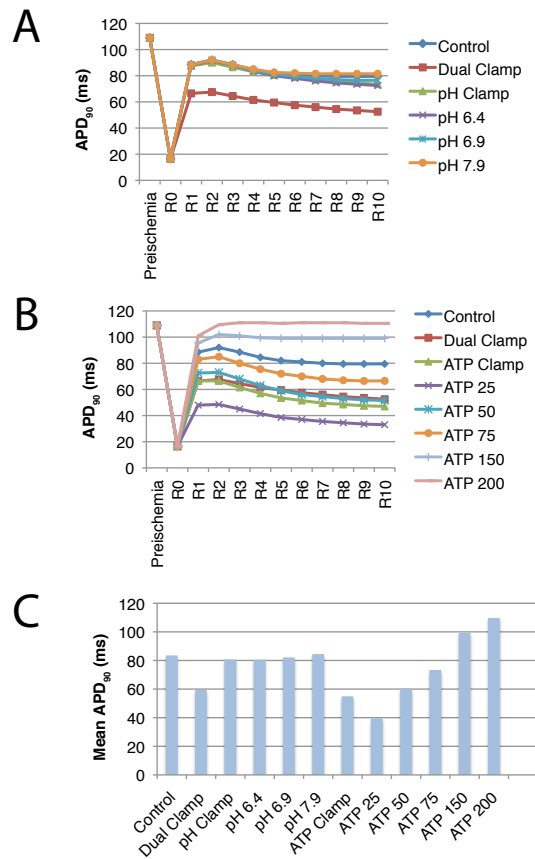

Figure S2: **Action potential duration (90) during simulated reperfusion.** The evolution of action potential duration (90) (APD<sub>90</sub>) throughout reperfusion is shown for the series of simulations examining the effects of varying pHe (A) and phosphometabolite concentrations (B). Values recorded at the end of preischemia, at the beginning of reperfusion (R0), and once per minute of reperfusion (R1-R10) are shown. The mean APD<sub>90</sub> during reperfusion for each simulation is shown in (C).

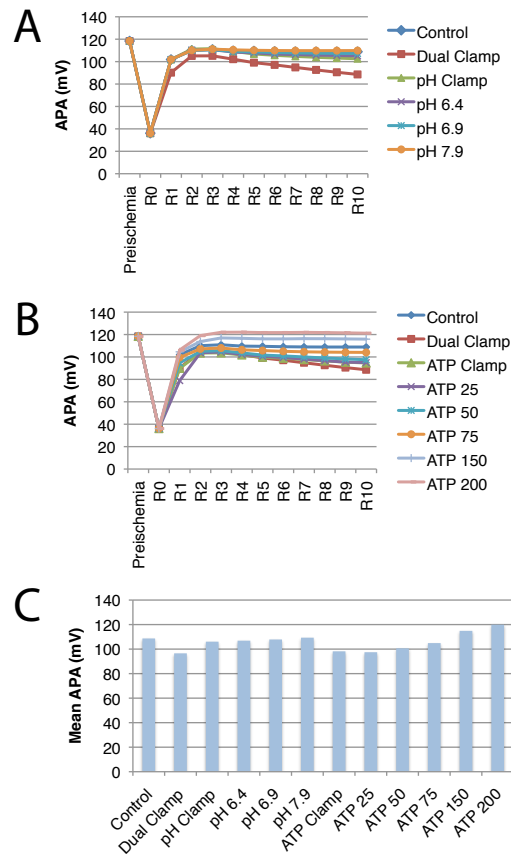

Figure S3: **Action potential amplitude during simulated reperfusion.** The evolution of action potential amplitude (APA) throughout reperfusion is shown for the series of simulations examining the effects of varying  $pH_e$  (A) and phosphometabolite concentrations (B). Values recorded at the end of preischemia, at the beginning of reperfusion (R0), and once per minute of reperfusion (R1-R10) are shown. The mean APA during reperfusion for each simulation is shown in (C).



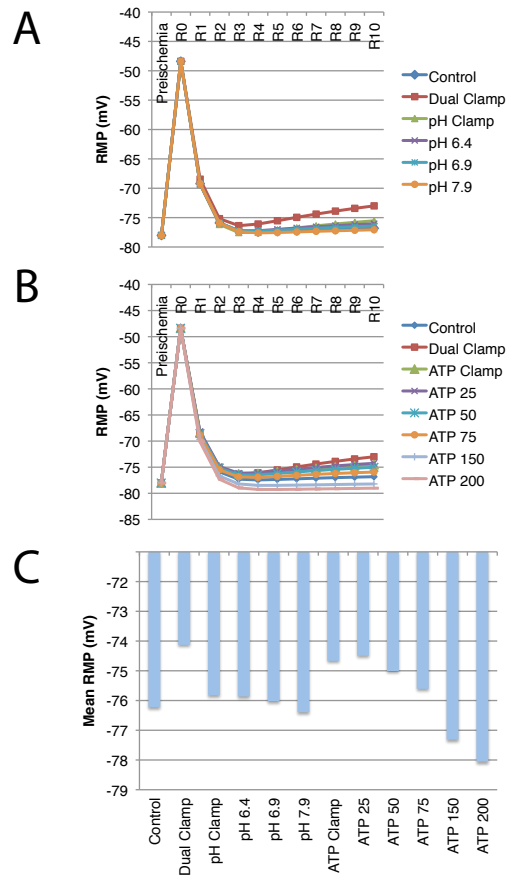

Figure S4: **Resting membrane potential during simulated reperfusion.** The evolution of resting membrane potential (RMP) throughout reperfusion is shown for the series of simulations examining the effects of varying  $\text{pH}_e$  (A) and phosphometabolite concentrations (B). Values recorded at the end of preischemia, at the beginning of reperfusion (R0), and once per minute of reperfusion (R1-R10) are shown. The mean RMP during reperfusion for each simulation is shown in (C).

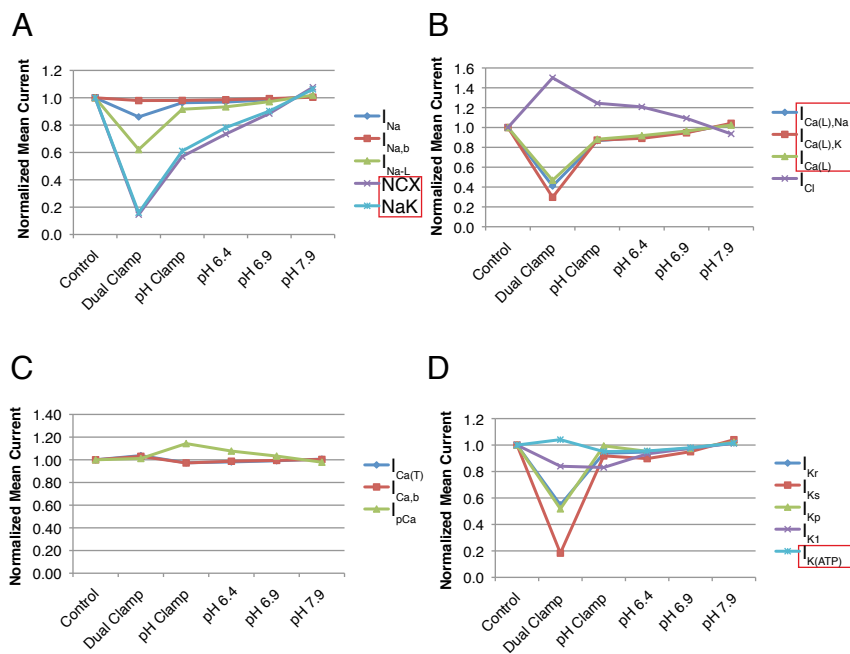

Figure S5: **Normalized mean currents throughout 10 minutes of reperfusion with variable  $pH_e$  recovery.** For each of 17 transmembrane currents, mean current in each simulation is normalized to the corresponding control. Currents that are directly modulated by pH and/or phosphometabolite concentrations are shown in red boxes.

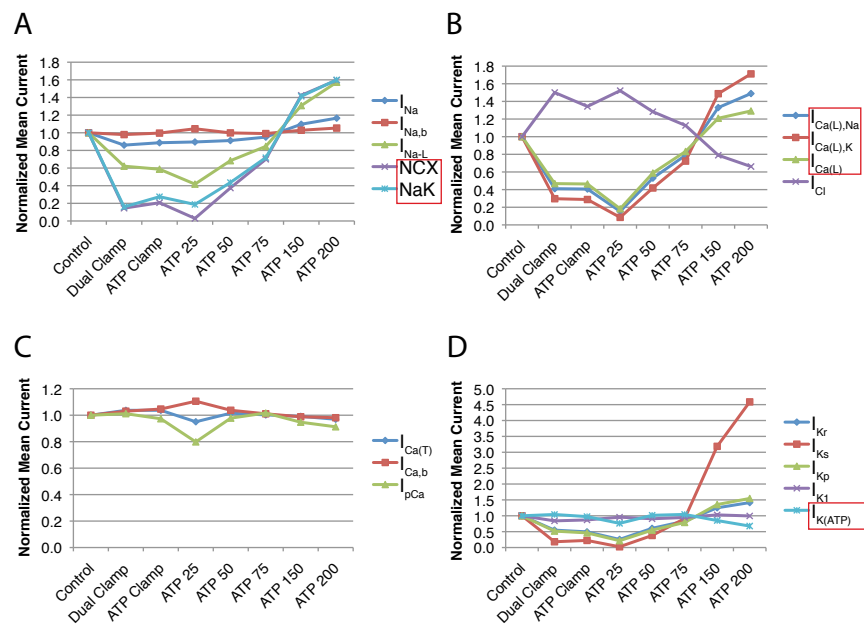

Figure S6: **Normalized mean currents throughout 10 minutes of reperfusion with variable phosphometabolite end-reperfusion target concentrations.** For each of 17 transmembrane currents, mean current in each simulation is normalized to the corresponding control. Currents that are directly modulated by pH and/or phosphometabolite concentrations are shown in red boxes.

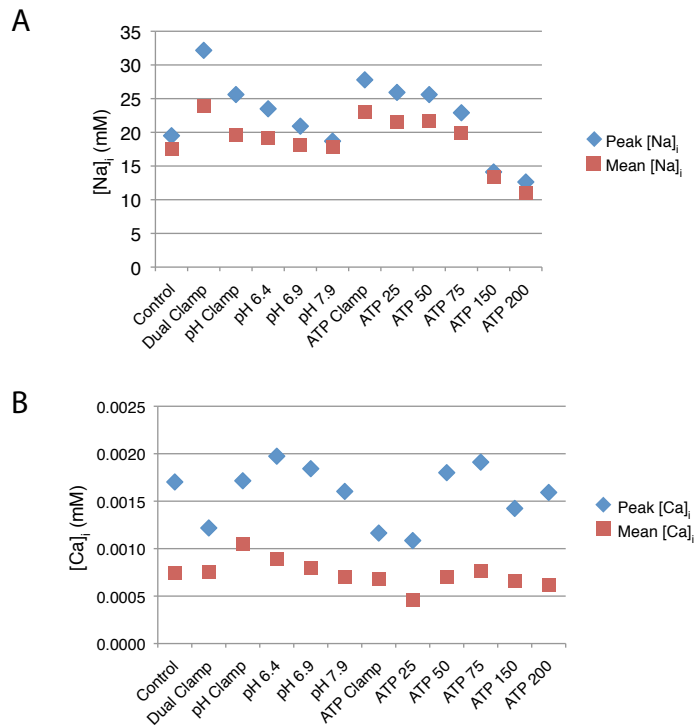

Figure S7: **Sodium and Calcium Concentrations During Simulated Reperfusion.** Peak (blue diamonds) and mean (red squares) intracellular sodium (A) and calcium (B) concentrations.

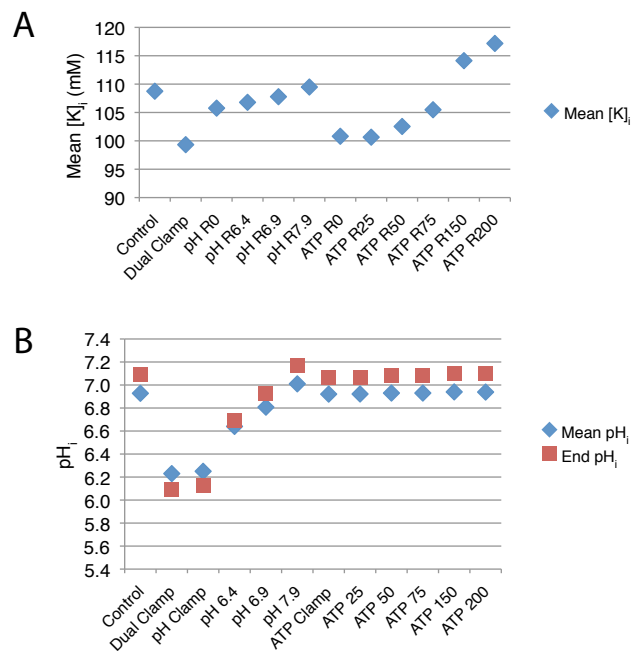

Figure S8: **Intracellular pH and Potassium Concentrations During Simulated Reperfusion.** (A) Mean intracellular potassium concentrations. (B) Mean intracellular pH (blue diamonds) and pH after 10 minutes of reperfusion (red squares).
